# Supplementary material for: Hydrogen sulfide coordinates glucose metabolism switch through destabilizing tetrameric pyruvate kinase M2
Source: PubMed Central journal article supplement — Nat Commun. 2024 Aug 29;15:7463. doi: 10.1038/s41467-024-51875-9 (PMC11358145; doi:10.1038/s41467-024-51875-9), 2024-08-29
Supplement: 41467_2024_51875_MOESM1_ESM.pdf [file 41467_2024_51875_MOESM1_ESM.pdf]

## Supplementary Information

### Hydrogen Sulfide Coordinates Glucose Metabolism Switch through Destabilizing Tetrameric Pyruvate Kinase M2

Rong-Hsuan Wang *et al.*,

**Corresponding authors:** Lu-Hai Wang ([luhaiwang@mail.cmu.edu.tw](mailto:luhaiwang@mail.cmu.edu.tw)), Hui-Chun Cheng ([hccheng@life.nthu.edu.tw](mailto:hccheng@life.nthu.edu.tw)) & Kai-Ti Lin ([ktlin@life.nthu.edu.tw](mailto:ktlin@life.nthu.edu.tw))

#### The file includes

Table S1-S4

Figure S1-S8

#### Other Supplementary Material for this manuscript includes the following:

**Supplementary Movie 1** - Time-lapse movie of cell division in MDA-MB-231 cells expressing wild-type PKM2.

**Supplementary Movie 2** - Time-lapse movie of cell division in MDA-MB-231 cells expressing PKM2<sup>C326S</sup>.

**Table S1. Overview of cysteine PTMs on PKM2 detected by LC-MS/MS.**

| <b>Modification</b>        | <b>Formulas</b>                                              | <b>Monoisotopic mass change</b> | <b>Detectable</b> | <b>Sites</b>                                 |
|----------------------------|--------------------------------------------------------------|---------------------------------|-------------------|----------------------------------------------|
| Beta-methylthiolation      | S-SCH <sub>3</sub><br>(SH modified by MMTS)                  | + 45.988                        | Yes               | Cys 31, 49, 152, 326, 358, 423, 424, and 474 |
| SSCAM                      | S-C <sub>2</sub> H <sub>3</sub> NOS<br>(SSH modified by IAM) | + 88.994                        | Yes               | Cys 326                                      |
| Carbamidomethylation (CAM) | S-C <sub>2</sub> H <sub>3</sub> NO<br>(SH modified by IAM)   | + 57.021                        | No                |                                              |
| S-Nitrosylation            | S-NO                                                         | +28.990                         | No                |                                              |
| Glutathionylation          | S-SG                                                         | +305.068                        | No                |                                              |
| Oxidation                  | S-OH                                                         | +15.995                         | No                |                                              |
| Dioxidation*               | S-SO <sub>2</sub> H                                          | +31.990                         | No                |                                              |
| Trioxidation*              | S-SO <sub>3</sub> H                                          | +47.985                         | No                |                                              |

Analysis of PTMs identified from cell lysates of MDA-MB-231.

\*Irreversible Modifications

**Table S2. Data collection, refinement, and MolProbity statistics.**

|                                                                                 | <b>PKM2 C326S</b>                      |
|---------------------------------------------------------------------------------|----------------------------------------|
| <b>Data collection</b>                                                          |                                        |
| Wavelength (Å)                                                                  | 0.97626                                |
| Resolution range (Å)                                                            | 29.69 - 3.10 (3.21 - 3.10)             |
| Space group                                                                     | C 1 2 1                                |
| Unit cell <i>a</i> , <i>b</i> , <i>c</i> (Å); $\alpha$ , $\beta$ , $\gamma$ (°) | 181.51, 156.37, 121.59; 90, 114.20, 90 |
| Total reflections                                                               | 55273 (5394)                           |
| Unique reflections                                                              | 15354 (1498)                           |
| Multiplicity                                                                    | 3.6 (3.6)                              |
| Completeness (%)                                                                | 98.4 (96.5)                            |
| Mean <i>I</i> / $\sigma$ ( <i>I</i> )                                           | 20.0 (2.4)                             |
| <i>R</i> <sub>meas</sub> (%)                                                    | 6.8 (60.1)                             |
| CC1/2                                                                           | 0.998 (0.877)                          |
| <b>Refinement</b>                                                               |                                        |
| Reflections used in refinement                                                  | 49956 (3326)                           |
| Reflections used for R-free                                                     | 1999 (133)                             |
| <i>R</i> <sub>work</sub> (%)                                                    | 18.4 (29.3)                            |
| <i>R</i> <sub>free</sub> (%)                                                    | 23.8 (34.9)                            |
| Number of non-hydrogen atoms                                                    |                                        |
| protein                                                                         | 14857                                  |
| Protein residues                                                                | 1938                                   |
| RMS (bonds) (Å)                                                                 | 0.022                                  |
| RMS (angles) (°)                                                                | 1.86                                   |
| Average <i>B</i> -factor (Å <sup>2</sup> )                                      |                                        |
| protein                                                                         | 55.31                                  |
| <b>MolProbity</b>                                                               |                                        |
| All atom clashscore                                                             | 11.26                                  |
| Poor rotamers (%)                                                               | 0.13                                   |
| Ramachandran Outliers (%)                                                       | 0.6                                    |
| Ramachandran Favored (%)                                                        | 90                                     |
| MolProbity score                                                                | 2.12                                   |

Statistics for the highest-resolution shell are shown in parentheses.

**Table S3. Interface areas for PKM2 tetramer.**

| State               | PDB ID | C-C interface (Å <sup>2</sup> ) | A-A interface (Å <sup>2</sup> ) |
|---------------------|--------|---------------------------------|---------------------------------|
| R state             | 4B2D   | 1239                            | 2842                            |
| T state             | 4FXJ   | 1151                            | 2469                            |
| PKM2 C326S          | 8HGF   | 1225                            | 2379                            |
| S-sulfhydrated PKM2 |        | 877                             | 2219                            |

**Table S4. Lists of primers and siRNA used in this study.**

| <b>Primers</b>        |                                    |
|-----------------------|------------------------------------|
| CCND1                 | Forward: GCGAGGAACAGAAGTG          |
|                       | Reverse: GAGTTGTTCGGTGTAGATGC      |
| HIF-1 $\alpha$        | Forward: GCCGAGGAAGAACTATGA        |
|                       | Reverse: GGTTGGTACTGTTGGTATC       |
| LDHA                  | Forward: CCAGAATAAGATTACAGTTGTTG   |
|                       | Reverse: GCCAAGTCCTTCATTAAGATA     |
| GLUT1                 | Forward: GCAGGAGATGAAGGAAGA        |
|                       | Reverse: AATAGAAGACAGCGTTGATG      |
| GLUT12                | Forward: TTGACTGTAAGTATCTTATTGG    |
|                       | Reverse: ACTAATTCTTCTTGGTGATGAC    |
| HK2                   | Forward: TTGACCAGGAGATTGACAT       |
|                       | Reverse: GCCATCTTCACCAGGATA        |
| GLS1                  | Forward: TTTGTGATTCTGACTTTATGT     |
|                       | Reverse: GCCTCTGTCCATCTACTG        |
| <b>siRNA sequence</b> |                                    |
| siCBS&CTH-1           | siCBS: 5'-CCUAUGGUCAGAAUCAACAtt-3' |
|                       | siCTH: 5'-GGAGCUGAUUUUCUAUCUtt-3'  |
| siCBS&CTH-2           | siCBS: 5'-CAGACCAAGUUGGCAAAGUtt-3' |
|                       | siCTH: 5'-CCUGGUGUCUGUUAAUUGUtt-3' |

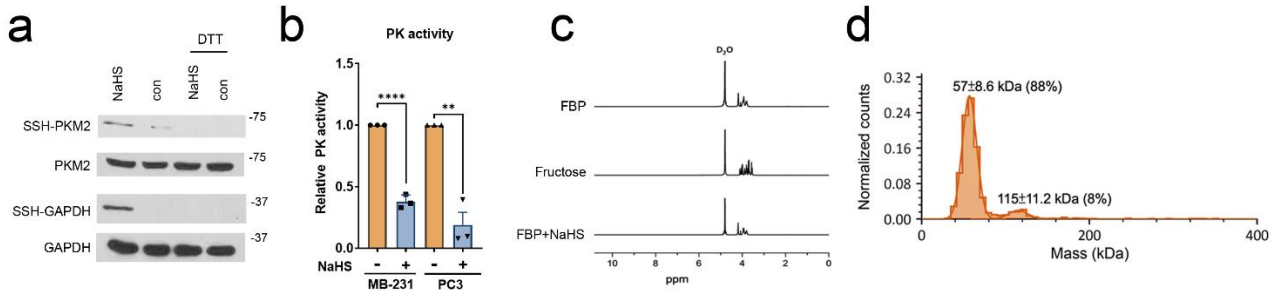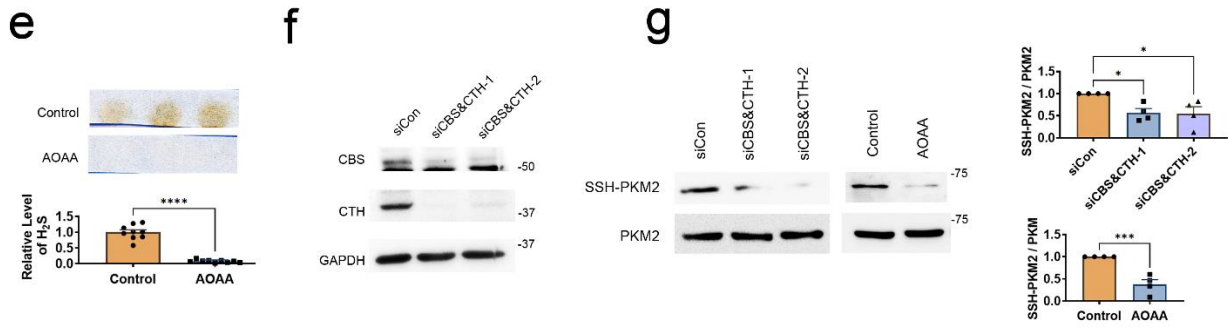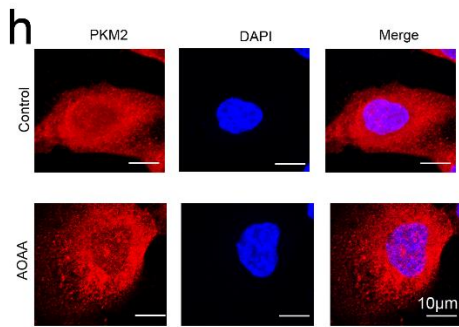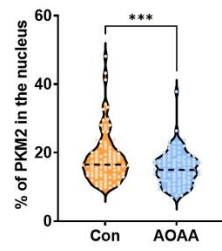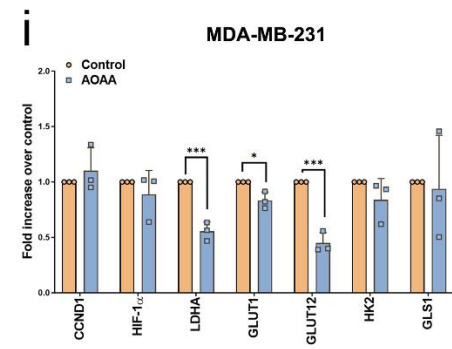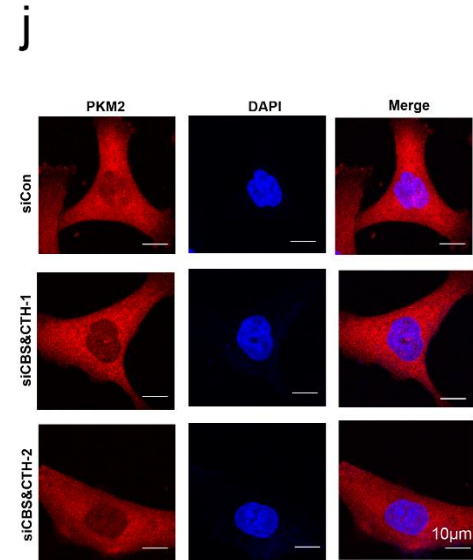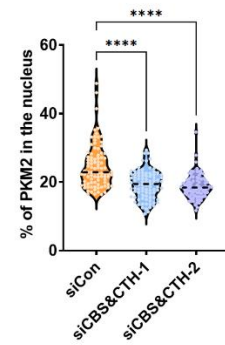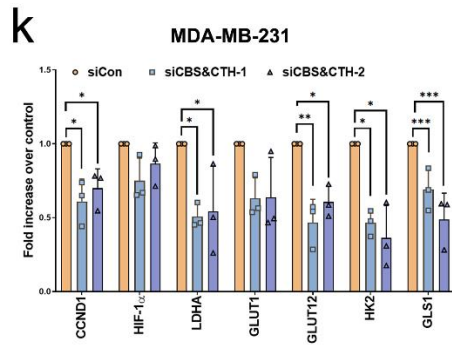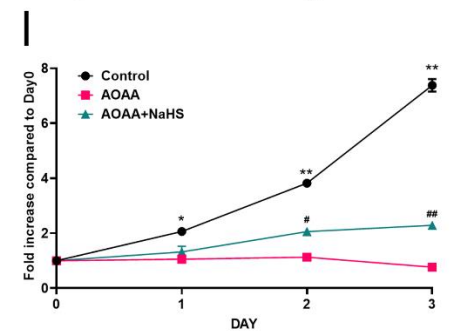

**Figure S1. H<sub>2</sub>S mediates PKM2 sulfhydration to inhibit PK activity.** **(a)** PC3 cell lysates were treated with 100  $\mu$ M NaHS for 30 min at 37°C and subjected with or without 1 mM DTT for 10 min. The biotin switch assay was then applied to precipitate sulfhydrated proteins. The biotin-labeled protein was analyzed by immunoblotting with anti-PKM2 or GAPDH antibody to detect sulfhydration of PKM2 and GAPDH (as positive control). Immunoblotting experiments were repeated at least 3 times with similar results. **(b)** MDA-MB-231 and PC3 cell lysates were treated with 1  $\mu$ M NaHS for 30 min at 37°C and pyruvate kinase activities were then assayed by measuring the amount of pyruvate production. Data are presented as the normalized means  $\pm$  SD (n=3 biological replicates). The two-tailed student's t-test was used for the statistical analysis (\*\* $p$ <0.01; \*\*\*\* $p$ <0.0001). **(c)** <sup>1</sup>H NMR spectra of 10 mg FBP, 10 mg Fructose, or 10 mg FBP co-treated with 1 mg NaHS. **(d)** Mass measurement of individual sulfhydrated PKM2 molecules by mass photometry. Mass distributions are shown in counts normalized by the total counts. The theoretical mass of a monomer, dimer, and tetramer are 60, 120, and 240 kDa, respectively. The fitted masses are indicated. **(e)** Upper: Photo of the lead acetate embedded filter paper after a 48-h incubation at 37 °C on a 96-well plate containing MDA-MB-231 cells with or without 0.25 mM AOAA. The dark circles are due to the formation of lead sulfide on the filter paper by H<sub>2</sub>S. Bottom: Quantification of the image using the Integrated Density (IntDen) function of ImageJ. Data are presented as the normalized means  $\pm$  SD (n=9 from 3 biological replicates). The two-tailed student's t-test was used for the statistical analysis (\*\*\*\* $p$ <0.0001). **(f)** Western blot analysis of CBS, CTH, and GAPDH expression in MDA-MB-231 cells with siCon (40nM), siCBS&CTH-1 (20nM each), and siCBS&CTH-2 (20nM each) transfection for 48 h. The samples derive from the same experiment but different gels for CTH, and another for CBS and GAPDH were processed in parallel. GAPDH is the internal control. Immunoblotting experiments were repeated at least 3 times with similar results. **(g)** Left: MDA-MB-231 cells with siCon, siCBS&CTH-1, and siCBS&CTH-2 transfection or with 0.25mM AOAA treatment for 48h were lysed and subjected to the biotin switch assay to precipitate sulfhydrated proteins. The biotin-labeled protein was analyzed by immunoblotting with anti-PKM2 antibody to detect sulfhydration of PKM2. Right: The SSH-labeled PKM2 was normalized with the level of total PKM2. Data are presented as the normalized means  $\pm$  SEM (n=3 biological replicates). One-way ANOVA followed by Tukey's multiple comparisons test (Left) or the student's t-test (Right) was used for the statistical analysis (\* $p$ <0.05; \*\*\* $p$ <0.001). Immunoblotting experiments were repeated at least 3 times with similar results. **(h)** Left: MDA-MB-231 cells were exposed to 0.25 mM AOAA for 24h. Subcellular localization of PKM2 was detected by immunostaining. Nuclei were counterstained with DAPI. The representative images are shown. Scale bars: 10  $\mu$ m. Right: The percentage of nuclear PKM2 is shown in a violin plot with individual points (n= 95-97 individual cells per group, data were combined from three independent experiments). The two-tailed student's t-test was used for the statistical analysis (\*\*\* $p$ <0.001). **(i)** MDA-MB-231 cells were treated with 0.25 mM AOAA for 24h. The relative expression of each gene was measured by qRT-PCR. Data are presented as the means  $\pm$  SD (n=3 biological replicates). The two-tailed student's t-test was used for the statistical analysis (\* $p$ <0.05; \*\*\* $p$ <0.001). **(j)** MDA-MB-231 cells with siCon, siCBS&CTH-1, and siCBS&CTH-2 transfection for 48h. Subcellular localization of PKM2 was

detected by immunostaining. Nuclei were counterstained with DAPI. The representative images are shown. Scale bars: 10  $\mu$ m. Right: The percentage of nuclear PKM2 is shown in a violin plot with individual points (n= 90 individual cells per group, data were combined from three independent experiments). One-way ANOVA followed by Tukey's multiple comparisons test was used for the statistical analysis (\*\*\*\* $p$ <0.0001). **(k)** MDA-MB-231 cells were transfected with siCon, siCBS&CTH-1, and siCBS&CTH-2 for 48h. The relative expression of each gene was measured by qRT-PCR. Data are presented as the means  $\pm$  SD (n=3 biological replicates). One-way ANOVA followed by Tukey's multiple comparisons test was used for the statistical analysis (\* $p$ <0.05; \*\* $p$ <0.01; \*\*\* $p$ <0.001). **(l)** Cell proliferation assays were performed in MDA-MB-231 cells treated with 0.25mM AOAA or 0.25mM AOAA together with 1 $\mu$ M NaHS. Data are presented as the means  $\pm$  SD (n=3 biological replicates). Two-way ANOVA followed by Tukey's multiple comparisons test was used for the statistical analysis (\* $p$ <0.05, \*\* $p$ <0.01, AOAA or AOAA+NaHS compared to the Control; # $p$ <0.05, ## $p$ <0.01 AOAA+NaHS compared to AOAA). Source data are provided as a Source Data file.



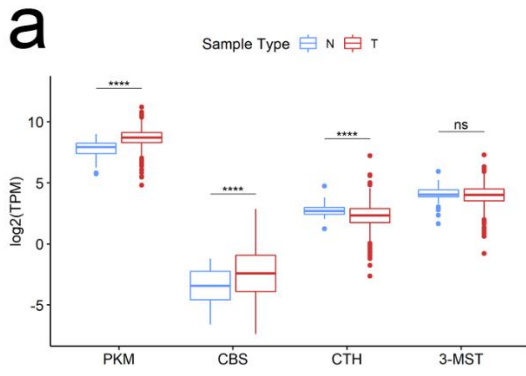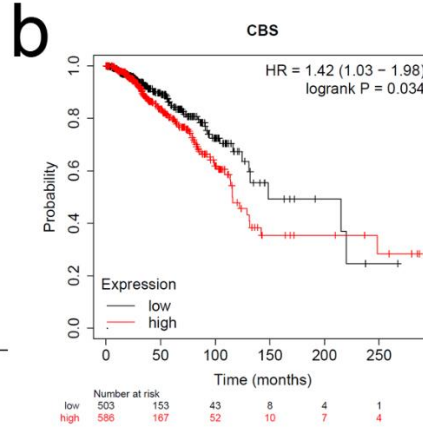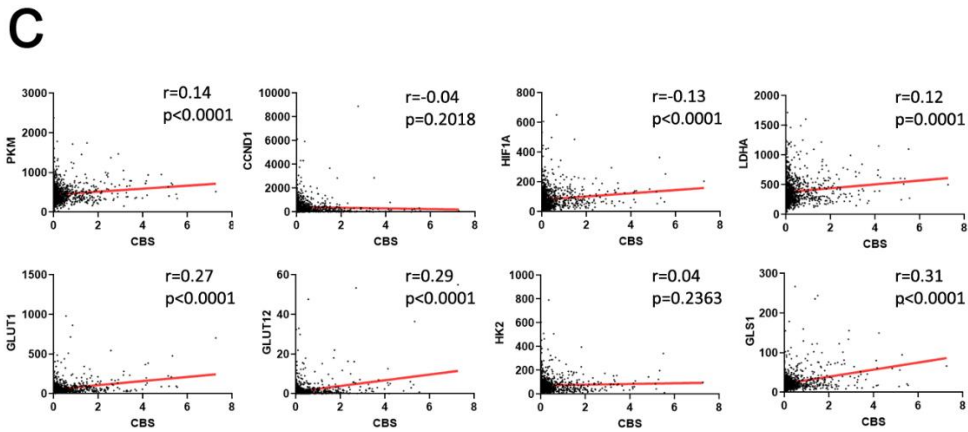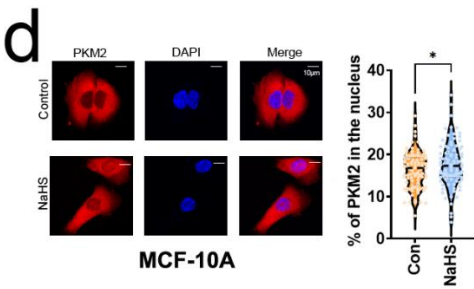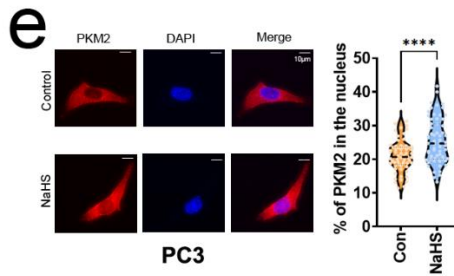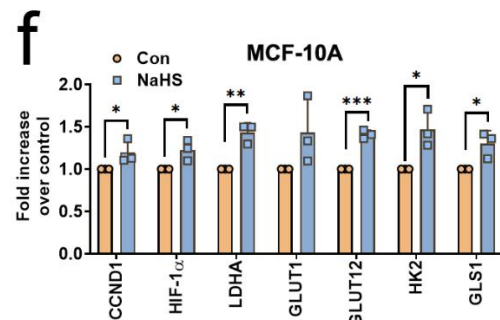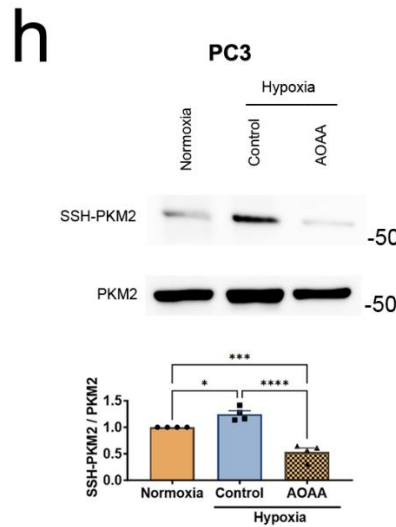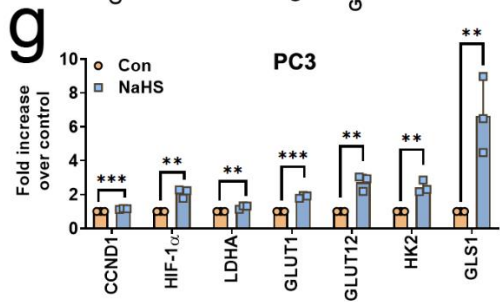

**Figure S2. The expression, prognosis, and correlation of PKM and H<sub>2</sub>S synthesizing enzymes in breast cancer patients.** **(a)** Box plots represent gene expressions of PKM, CBS, CTH, and 3-MST between the normal breast tissues (N; n = 60) and breast tumors (T; n=1034) from the TCGA-BRCA RNA-seq dataset, measured in TPMs. The student's t-test was used for the statistical analysis (\*\*\*\* $p < 0.0001$ ; ns, not significant). **(b)** Kaplan-Meier overall survival analysis of breast cancer patients presenting high (n=586) or low (n=503) CBS expression. The RNA-seq dataset was from TCGA cohorts. The p-value was calculated using the log-rank test. **(c)** Plot of Pearson correlation of the expression level for CBS versus PKM or PKM2 response genes, including CCND1, HIF1A, LDHA, GLUT1, GLUT12, HK2, and GLS1. **(d, e)** Left: MCF-10A **(d)** and PC3 **(e)** were exposed to 1 $\mu$ M NaHS for 1hr. Subcellular localization of PKM2 was detected by immunocytochemistry. Nuclei were counterstained with DAPI. The representative images are shown. Scale bars: 10  $\mu$ m. Right: The percentage of nuclear PKM2 is shown in a violin plot with individual points (n= 95-97 individual cells per group, data were combined from three independent experiments). One-way ANOVA followed by Tukey's multiple comparisons test was used for the statistical analysis (\* $p < 0.05$ ; \*\*\*\* $p < 0.0001$ ). **(f, g)** MCF-10A **(f)** and PC3 **(g)** cells were treated with 1 $\mu$ M NaHS for 24 hrs. The relative expression of genes regulated by PKM2 was measured by qRT-PCR. Data are presented as the means  $\pm$  SD (n=3 biological replicates). The student's t-test was used for the statistical analysis (\* $p < 0.05$ ; \*\* $p < 0.01$ ; \*\*\* $p < 0.001$ ). **(h)** Upper: PC3 cells were under normal (20% O<sub>2</sub>) or hypoxia incubator (1% O<sub>2</sub>) for 48h with or without 0.25 mM AOAA. Cells were then lysed and subjected to the biotin switch assay to precipitate sulfhydrated proteins. The biotin-labeled protein was analyzed by immunoblotting with anti-PKM2 antibody to detect sulfhydration of PKM2. Bottom: The SSH-labeled PKM2 was normalized with the level of total PKM2. Data are presented as the means  $\pm$  SEM (n=4 biological replicates). One-way ANOVA followed by Tukey's multiple comparisons test was used for the statistical analysis (\* $p < 0.05$ ; \*\*\* $p < 0.001$ ; \*\*\*\* $p < 0.0001$ ). Immunoblotting experiments were repeated at least 3 times with similar results. Source data are provided as a Source Data file.

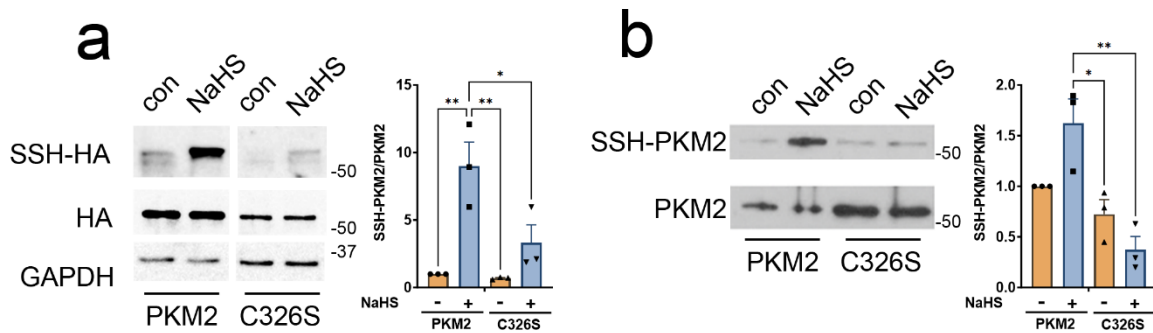

**Figure S3. PKM2 is sulfhydrated by H<sub>2</sub>S, notably cysteine 326.** **(a)** Left: The cell lysate from MDA-MB-231 cells transfected with HA-tagged PKM2 or PKM2<sup>C326S</sup> mutants was treated with 100 μM NaHS for 30 min at 37°C. The modified biotin switch assay was then applied to precipitate sulfhydrated protein. The biotin-labeled protein was analyzed by immunoblotting with anti-HA antibodies to detect sulfhydration of transfected PKM2. Right: The SSH-labeled HA-PKM2 was normalized with the level of total HA-PKM2. Data are presented as the means ± SEM (n=3 biological replicates). One-way ANOVA followed by Tukey's multiple comparisons test was used for the statistical analysis (\*p<0.05; \*\*p<0.01). Immunoblotting experiments were repeated at least 3 times with similar results. **(b)** Left: Purified recombinant PKM2 or PKM2<sup>C326S</sup> mutant protein was treated with 100 μM NaHS for 30 min at 37°C. The modified biotin switch assay was then applied to precipitate sulfhydrated protein. The biotin-labeled protein was analyzed by immunoblotting with anti-PKM2 antibody to detect sulfhydration of PKM2. Right: The SSH-labeled PKM2 was normalized with the level of total PKM2. Data are presented as the means ± SEM (n=3 biological replicates). One-way ANOVA followed by Tukey's multiple comparisons test was used for the statistical analysis (\*p<0.05; \*\*p<0.01). Immunoblotting experiments were repeated at least 3 times with similar results. Source data are provided as a Source Data file.

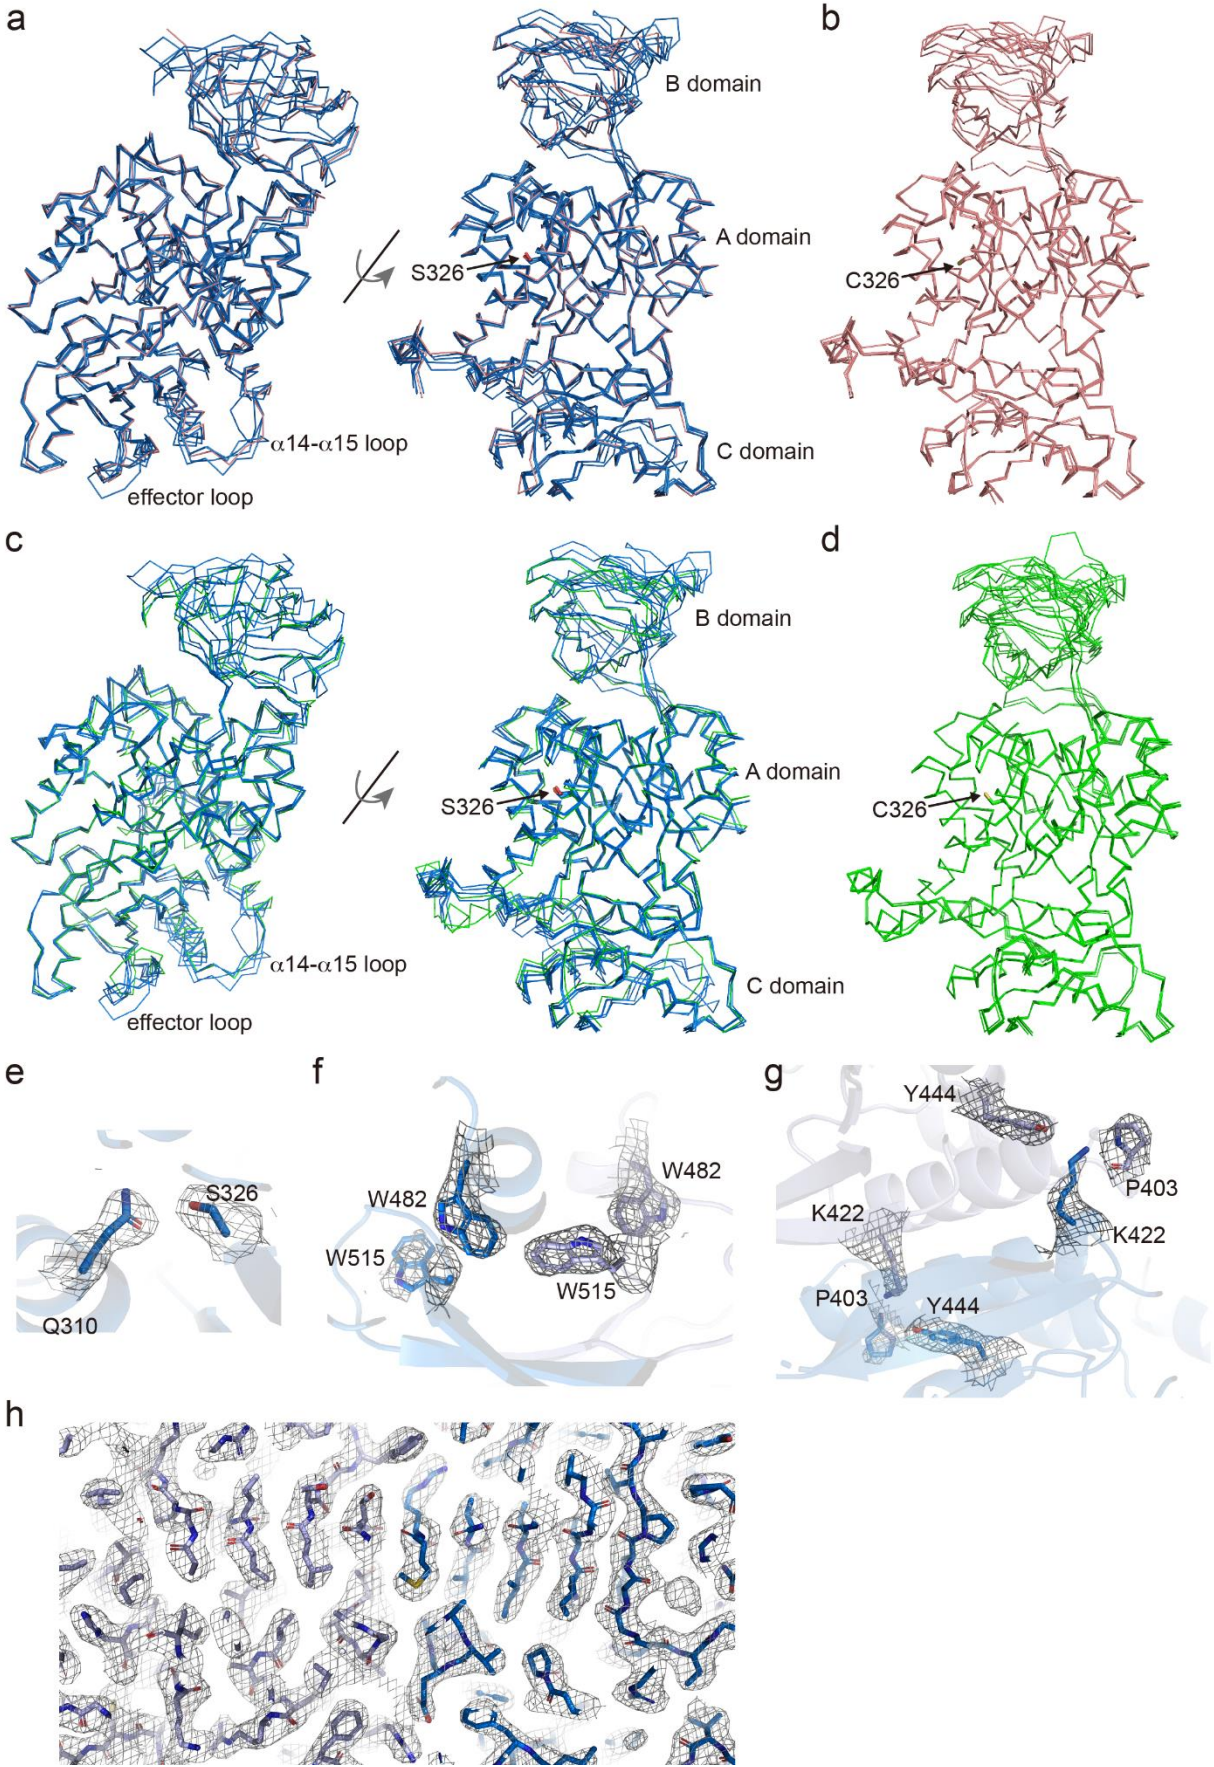

**Figure S4. Structural analyses of PKM2<sup>C326S</sup>, compared to the T and R states.** (a) Structural overlay of PKM2<sup>C326S</sup> protomers on one of the T-state protomers. (b) Structural overlay of PKM2 T-state protomers (PDB: 4FXJ). (c) Structural overlay of PKM2<sup>C326S</sup> protomers on one of the R-state protomers. (d) Structural overlay of PKM2 R-state protomers (PDB: 4B2D). PKM2<sup>C326S</sup> protomers are in blue, T-state protomers in pink, and R-state protomers in green. (e-g) 2Fo-Fc electron density map (gray) contoured at 1  $\sigma$  for the designated residues. (h) 2Fo-Fc electron density map (gray) at 1 $\sigma$  for the A (blue) and D (light blue) protomer interface.



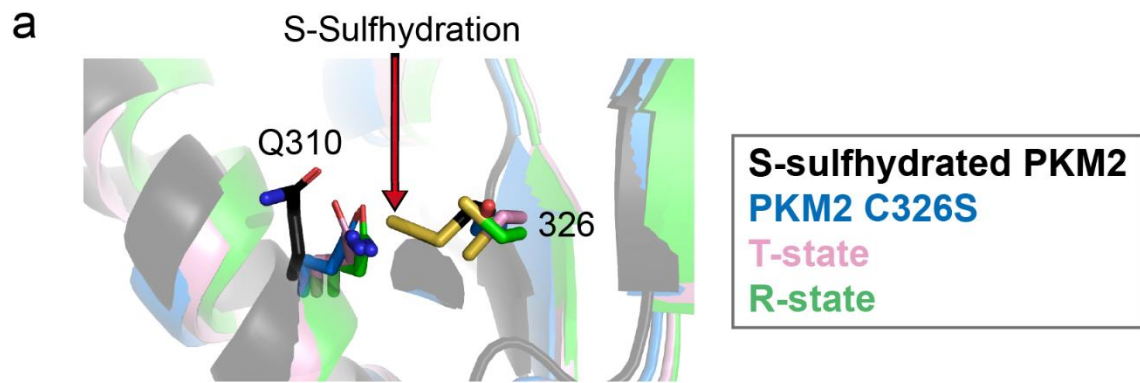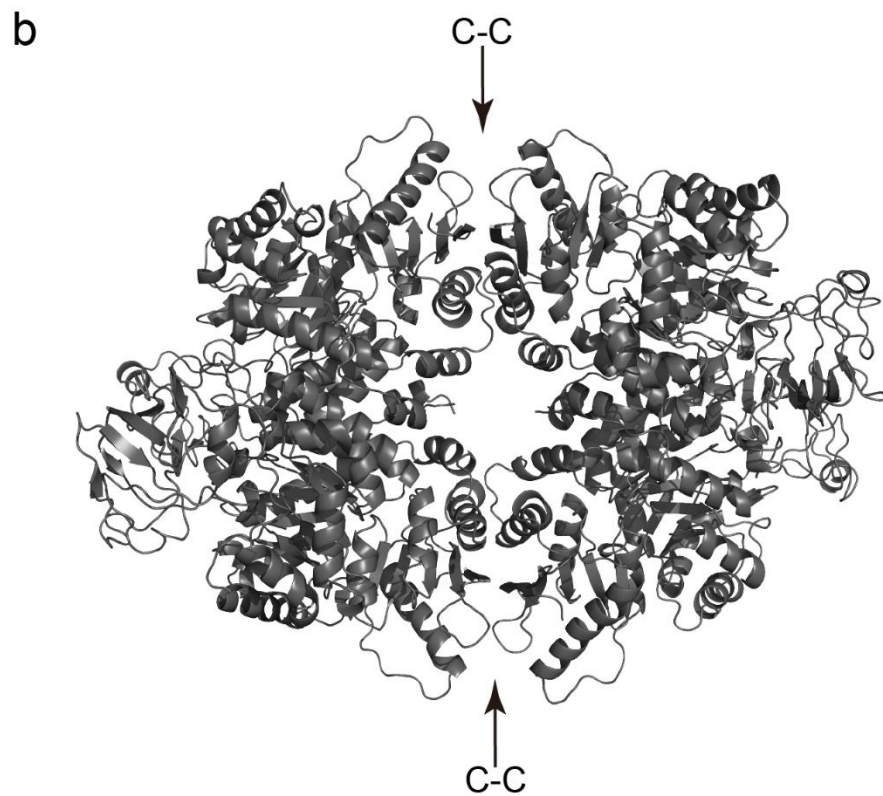

**Figure S5. Simulation of PKM2 structure with S-sulfhydration at C326. (a)** S-sulfhydration at C326 is shown for the most stable conformer (black), aligned with the C326S mutant (blue), T-state (pink), and R-state (green) conformations. **(b)** Simulation structure of the PKM2 tetramer with S-sulfhydration at C326.

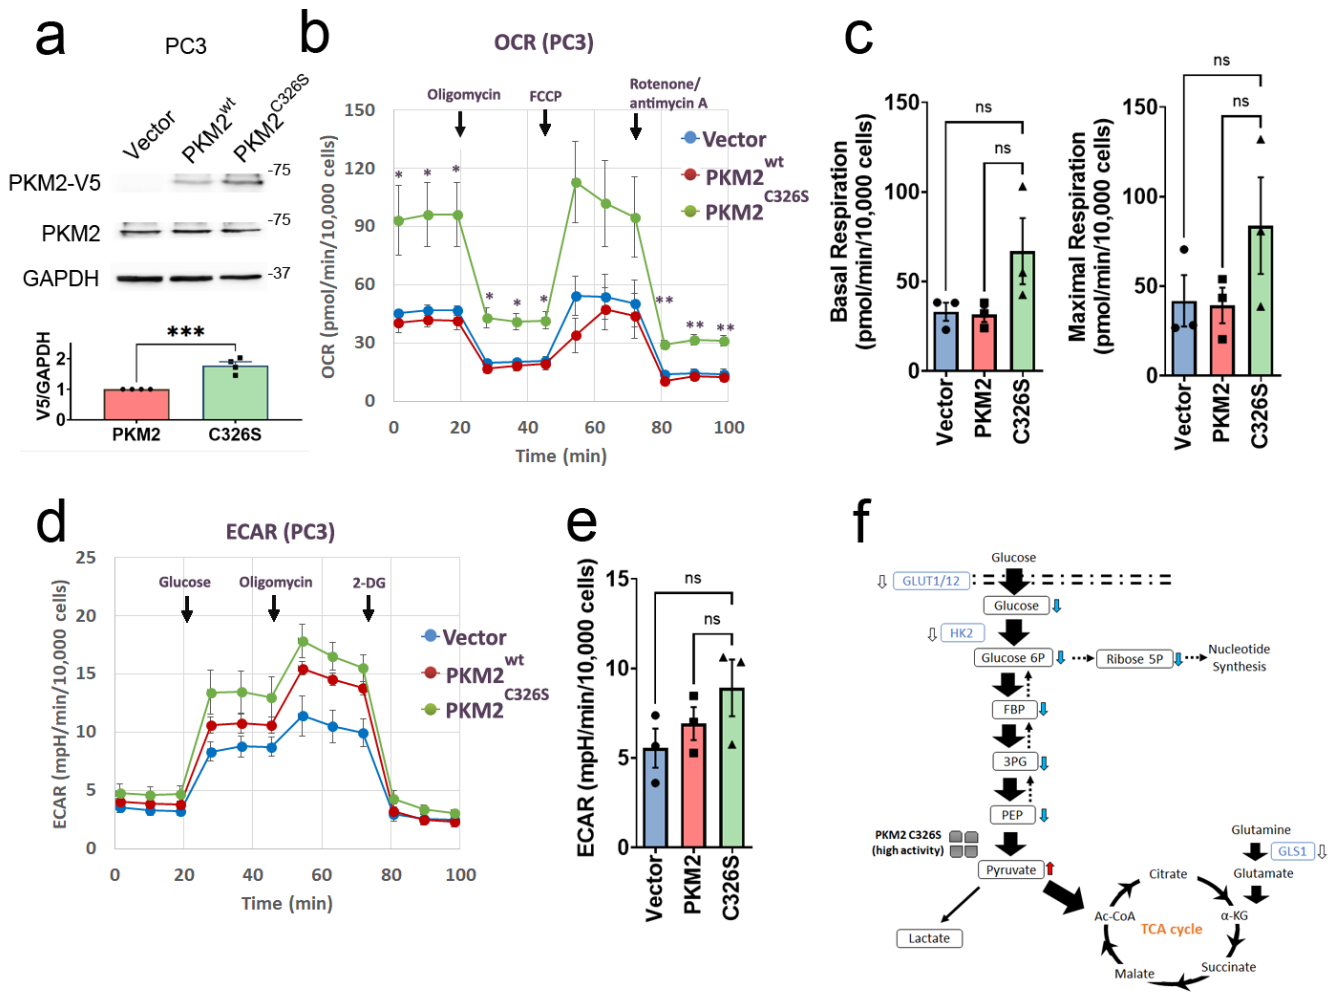

**Figure S6. Blockade of PKM2 C326 sulfhydration enhances mitochondrial oxidative phosphorylation in PC3 cells.** (a) Upper: Western blot analysis of stable expression of V5-tagged PKM2 (wild type or C326S mutant) in PC3 cells. The samples derive from the same experiment but different gels for V5, and another for PKM2 and GAPDH were processed in parallel. GAPDH is the internal control. Bottom: The V5-tagged PKM2 was normalized with the level of GAPDH. Data are presented as the normalized means  $\pm$  SEM (n=3 biological replicates). The two-tailed student's t-test was used for the statistical analysis (\*\* $p < 0.001$ ). Immunoblotting experiments were repeated at least 3 times with similar results. (b) The oxygen consumption rate (OCR) curves in PC3 cells expressing vector alone, PKM2<sup>wt</sup>, or PKM2<sup>C326S</sup>. Cells were treated with oligomycin, FCCP, and rotenone/antimycin A, respectively. Data are presented as means  $\pm$  SD (n=3 biological replicates). The one-tailed student's t-test was used for the statistical analysis (\* $p < 0.05$ , \*\* $p < 0.01$ ; C326S compared to the vector or PKM2 group). (c) The level of basal OCR and maximal OCR normalized to the cell numbers in PC3 cells expressing vector alone, PKM2<sup>wt</sup>, or PKM2<sup>C326S</sup> (n=3 biological replicates). One-way ANOVA followed by Tukey's multiple comparisons test was used for the statistical analysis (ns: not significant). (d) The ECAR curves in PC3 cells expressing Vector alone, PKM2<sup>wt</sup>, or PKM2<sup>C326S</sup>. Cells were treated with glucose, oligomycin, and 2-DG, respectively. Data are presented as means  $\pm$  SD (n=3 biological replicates). (e) Glycolysis normalized to the cell numbers in PC3 cells expressing Vector alone, PKM2<sup>wt</sup>, or PKM2<sup>C326S</sup> (n=3 biological replicates). One-way ANOVA followed by Tukey's multiple comparisons test was used for the statistical analysis (ns: not significant). (f) Schematic diagram of how blocking PKM2 sulfhydration at C326 facilitates the TCA cycle, resulting in the shortage of glycolytic intermediates for rapid DNA synthesis and enhanced oxidative phosphorylation. Source data are provided as a Source Data file.



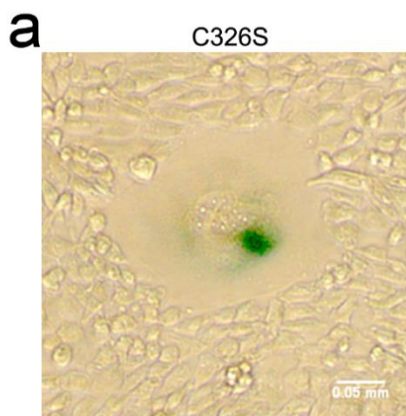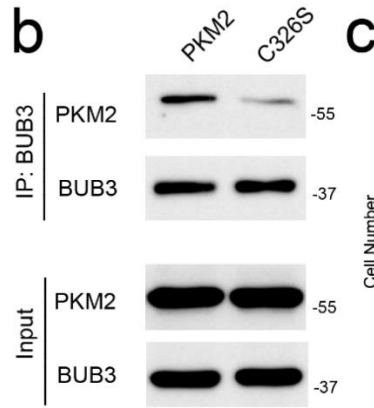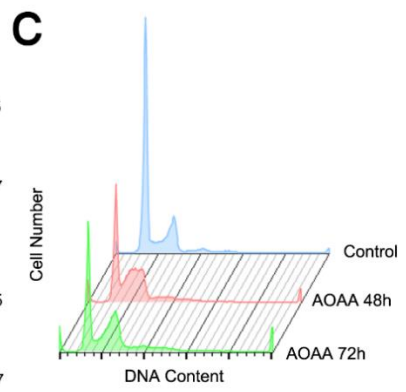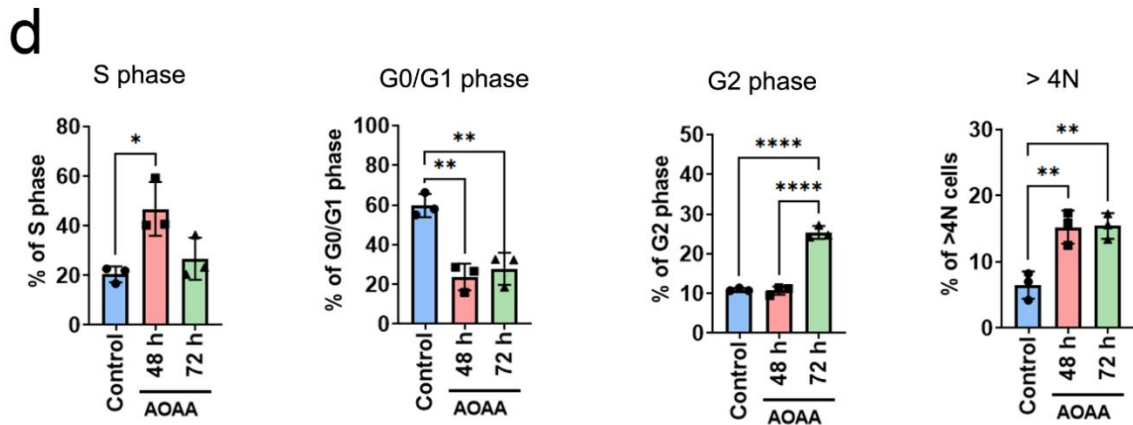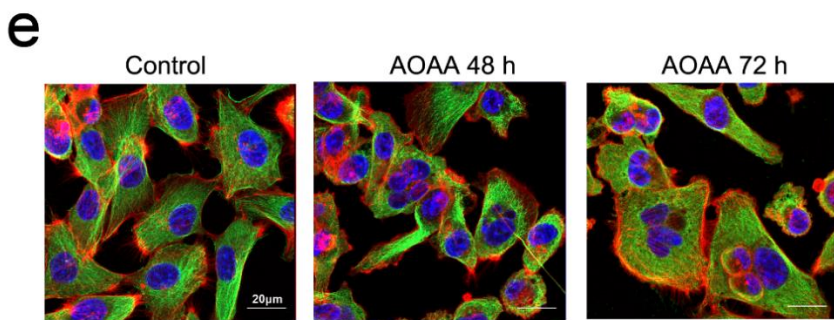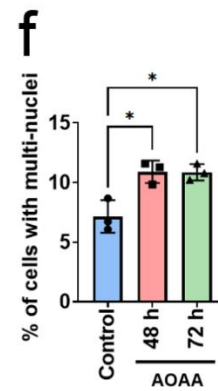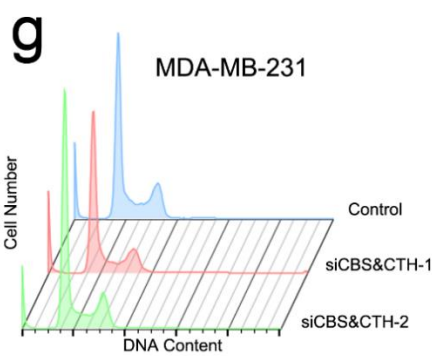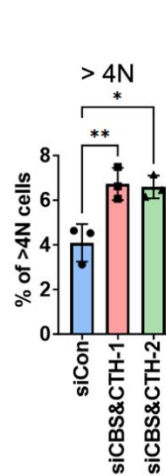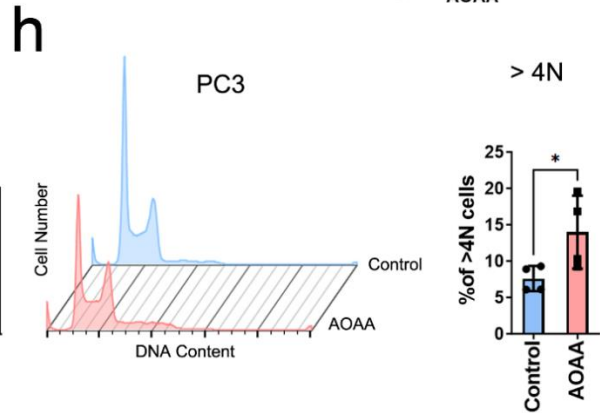

**Figure S7. Blockade of PKM2 sulfhydration at C326 or depletion of H<sub>2</sub>S causes defects in cell cycle progression and cytokinesis failure.** (a) SA- $\beta$ -gal activity staining of MDA-MB-231 cells expressing PKM2<sup>C326S</sup>. Scale bar: 0.05 mm. (b) MDA-MB-231 cells transfected with wild-type PKM2 or PKM2<sup>C326S</sup> were synchronized by double thymidine block (2 mM) and then with RO-3306 (2.5  $\mu$ g/mL) for 12 hr. After being released for 6 h, cells entering metaphase were harvested, immunoprecipitated with anti-BUB3 antibody, and immunoblotted with PKM2 and BUB3 antibodies. Immunoblotting experiments were repeated at least 3 times with similar results. (c, d) MDA-MB-231 cells were treated with 0.25 mM AOAA for 48 or 72 h. The cell cycle was examined by the PI staining method and measured by flow cytometry. (c) The representative image is shown. (d) The percentage of cells at different cell cycle phases was analyzed. Data are presented as the means  $\pm$  SD (n=3 biological replicates). One-way ANOVA followed by Tukey's multiple comparisons test was used for the statistical analysis (\* $p$ <0.05; \*\* $p$ <0.01; \*\*\*\* $p$ <0.0001). (e, f) Immunostaining of actin filaments (Red),  $\alpha$ -tubulin (Green), and DNA counterstaining with DAPI (Blue) of MDA-MB-231 cells with 0.25 mM AOAA treatment for 48 or 72 h. (e) Representative images are shown. Scale Bar: 20 $\mu$ m. (f) The percentage of poly-nuclei cells (n $\geq$ 2) was analyzed. Data are presented as the means  $\pm$  SD (n=3 biological replicates). One-way ANOVA followed by Tukey's multiple comparisons test was used for the statistical analysis (\* $p$ <0.05). (g) MDA-MB-231 cells were transfected with siCon, siCBS&CTH-1, and siCBS&CTH-2 for 72 h. The cell cycle was examined by the PI staining method and measured by flow cytometry. Left: The representative image is shown. Right: The percentage of cells at different cell cycle phases was analyzed. Data are presented as the means  $\pm$  SD (n=3 biological replicates). One-way ANOVA followed by Tukey's multiple comparisons test was used for the statistical analysis (\* $p$ <0.05; \*\* $p$ <0.01). (h) PC3 cells were treated with 0.25 mM AOAA for 48h. The cell cycle was examined by the PI staining method and measured by flow cytometry. Left: The representative image is shown. Right: The percentage of cells at different cell cycle phases was analyzed. Data are presented as the means  $\pm$  SD (n=4 biological replicates). The one tailed student's t-test was used for the statistical analysis (\* $p$ <0.05). Source data are provided as a Source Data file.

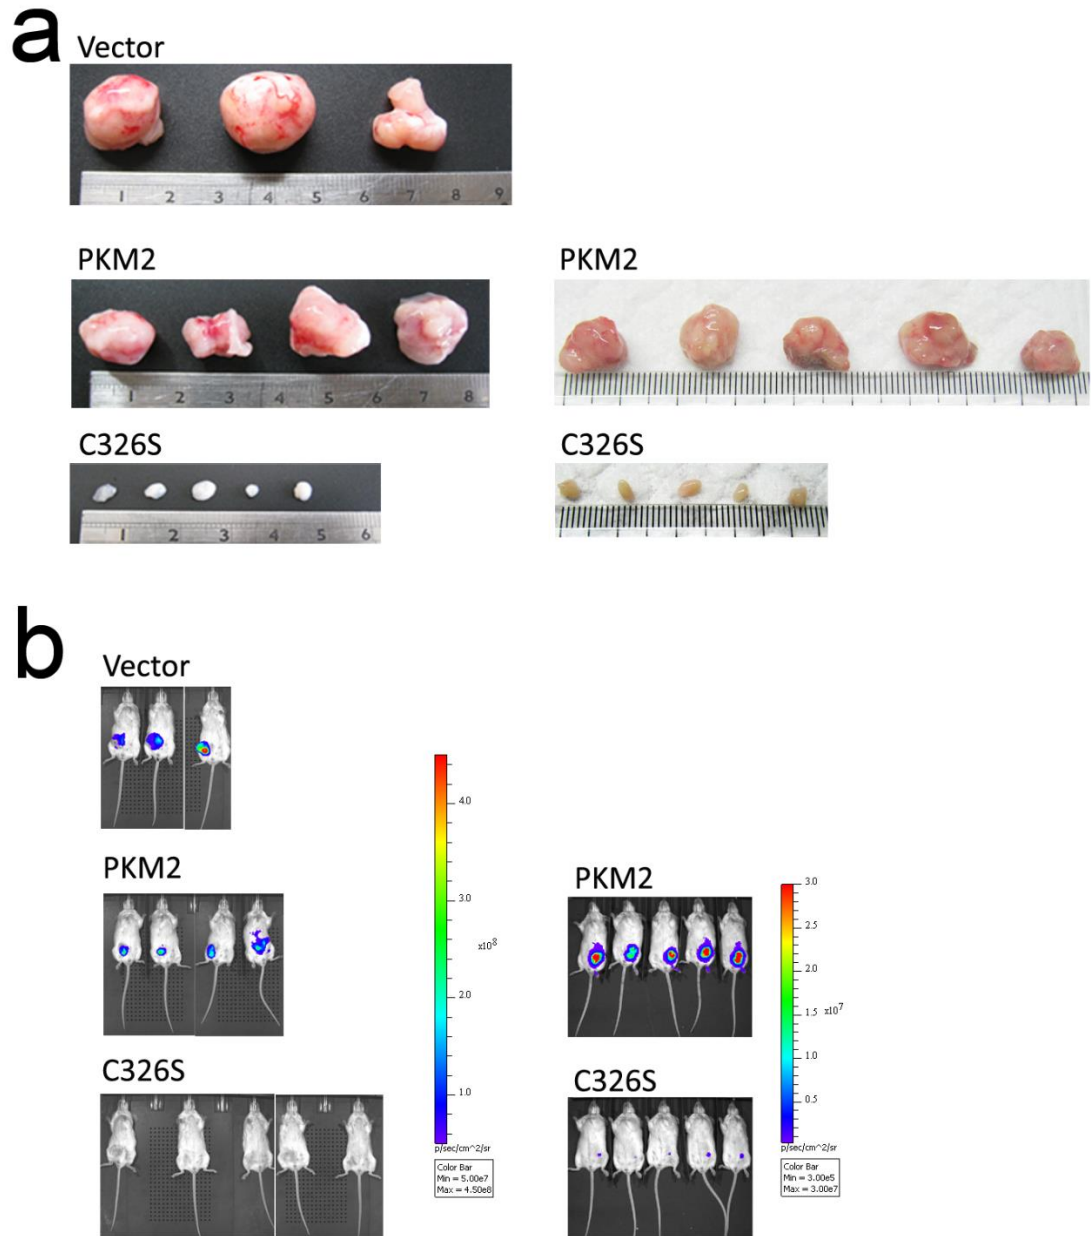

**Figure S8. Blockade of PKM2 sulfhydrylation at C326 reduces tumor growth in the mouse xenograft model. (a)** Pictures of all xenograft tumors of MDA-MD-231 cells expressing vector, PKM2<sup>wt</sup> or PKM2<sup>C326S</sup>. **(b)** All animal bioluminescence images after implantation of MDA-MD-231 cells expressing vector, PKM2<sup>wt</sup> or PKM2<sup>C326S</sup> for 7 weeks.
